1 **Running Head:** Genetic determinants of seed element composition

2 **Corresponding Author:**

3 Ivan Baxter

4 975 North Warson Road

5 Saint Louis, MO 63132

6 Phone: 314.587.1438

7 Fax: 314.587.1538

8 [ivan.baxter@ars.usda.gov](mailto:ivan.baxter@ars.usda.gov)

9

10 **Research Area:** Biochemistry and Metabolism

11 **Secondary Research Area:** Genes, Development and Evolution

12

13

14

15

16

17

18

19

20

21

22

23

24

25

26

27

28

29

30

31 **Title:** Integration of experiments across diverse environments identifies the genetic determinants  
32 of variation in *Sorghum bicolor* seed element composition

33

34 **Authors:** Nadia Shakoor<sup>1</sup>, Greg Ziegler<sup>5</sup>, Brian P. Dilkes<sup>2</sup>, Zachary Brenton<sup>3</sup>, Richard Boyles<sup>3</sup>,  
35 Erin L. Connolly<sup>4</sup>, Stephen Kresovich<sup>3</sup> and Ivan Baxter<sup>5\*</sup>

36 <sup>1</sup>*Donald Danforth Plant Science Center, St. Louis, Missouri, 63132 (N.S.)*

37 <sup>2</sup>*Department of Horticulture and Landscape Architecture, Purdue  
38 University, West Lafayette, Indiana 47907 (B.P.D.)*

39 <sup>3</sup>*Department of Genetics and Biochemistry, Clemson University, Clemson, South Carolina,  
40 29631 (Z.B., R.B., S.K.)*

41 <sup>4</sup>*Department of Biological Sciences, University of South Carolina, Columbia, South Carolina,  
42 29208 (E.C.)*

43 <sup>5</sup>*USDA-ARS, Donald Danforth Plant Science Center, St. Louis, Missouri, 63132 (G.Z., I.B.)*

44

#### 45 **Email Addresses**

46 Ivan Baxter ([ivan.baxter@ars.usda.gov](mailto:ivan.baxter@ars.usda.gov))

47 Nadia Shakoor ([nshakoor@danforthcenter.org](mailto:nshakoor@danforthcenter.org))

48 Greg Ziegler ([greg.ziegler@ars.usda.gov](mailto:greg.ziegler@ars.usda.gov))

49 Brian P. Dilkes ([bdilkes@purdue.edu](mailto:bdilkes@purdue.edu))

50 Zachary Brenton ([zwbrent@clemson.edu](mailto:zwbrent@clemson.edu))

51 Richard Boyles ([rboyles@clemson.edu](mailto:rboyles@clemson.edu))

52 Erin L. Connolly ([erinc@mailbox.sc.edu](mailto:erinc@mailbox.sc.edu))

53 Stephen Kresovich ([skresov@clemson.edu](mailto:skresov@clemson.edu))

54

55 **One sentence summary:** High-throughput measurements of element accumulation and genome-  
56 wide association analysis across multiple environments identified novel alleles controlling seed  
57 element accumulation in *Sorghum bicolor*.

58

59

60

61

62 This project was partially funded by the iHUB Visiting Scientist Program  
63 (<http://www.ionomicshub.org>), Chromatin, Inc., NSF EAGER (1450341) to I.B. and BPD, NSF  
64 IOS 1126950 to IB, NSF IOS-0919739 to EC, and BMGF (OPP 1052924) to B.P.D.

65

66 \*Corresponding Author

67 Ivan Baxter

68 975 North Warson Road

69 Saint Louis, MO 63132

70 Phone: 314.587.1438

71 Fax: 314.587.1538

72 [ivan.baxter@ars.usda.gov](mailto:ivan.baxter@ars.usda.gov)

73

74

75

76

77

78

79

80

81

82

83

84

85

86

87

88

89

90

91

92

93 **Abstract:**

94 Seedling establishment and seed nutritional quality require the sequestration of sufficient  
95 element nutrients. Identification of genes and alleles that modify element content in the grains of  
96 cereals, including *Sorghum bicolor*, is fundamental to developing breeding and selection  
97 methods aimed at increasing bioavailable element content and improving crop growth. We have  
98 developed a high throughput workflow for the simultaneous measurement of multiple elements  
99 in sorghum seeds. We measured seed element levels in the genotyped Sorghum Association  
100 Panel (SAP), representing all major cultivated sorghum races from diverse geographic and  
101 climatic regions, and mapped alleles contributing to seed element variation across three  
102 environments by genome-wide association. We observed significant phenotypic and genetic  
103 correlation between several elements across multiple years and diverse environments. The power  
104 of combining high-precision measurements with genome wide association was demonstrated by  
105 implementing rank transformation and a multilocus mixed model (MLMM) to map alleles  
106 controlling 20 element traits, identifying 255 loci affecting the sorghum seed ionome. Sequence  
107 similarity to genes characterized in previous studies identified likely causative genes for the  
108 accumulation of zinc (Zn) manganese (Mn), nickel (Ni), calcium (Ca) and cadmium (Cd) in  
109 sorghum seed. In addition to strong candidates for these four elements, we provide a list of  
110 candidate loci for several other elements. Our approach enabled identification of SNPs in strong  
111 LD with causative polymorphisms that can be evaluated in targeted selection strategies for plant  
112 breeding and improvement.

113

114

115 **Introduction:**

116 *Sorghum bicolor* is a globally cultivated source of food, feed, sugar and fiber. Classified  
117 as a bioenergy feedstock, sorghum biomass also has unique advantages for sustainable biofuel  
118 production (Kimber et al., 2013). The element composition of stems, leaves and reproductive  
119 organs all contribute significantly to biomass quality. The seed bearing reproductive organs, or  
120 panicles, in sorghum represent up to 30% of the total dry matter yield (Amaducci et al., 2004).  
121 Inorganic elements, particularly alkali metals, influence the combustion process and can limit the  
122 effectiveness of biomass conversion (Oberberger et al., 1997; Monti et al., 2008). Targeted  
123 reduction of specific elements and compositional traits via transgenic and breeding approaches  
124 can be implemented to improve biomass quality.

125 Increasing the bioavailable elemental nutrient content in the edible portions of the crop  
126 has the potential to increase the value of sorghum for human and animal nutrition. Plant-based  
127 diets, in which grains compose the major food source, require the availability of essential  
128 elements in the plant seed. Iron (Fe) and Zn deficiencies affect over 2 billion people worldwide  
129 (Organization, 2002), and increases in the accumulation and bioavailability of these elements in  
130 cereal grains, including sorghum, could potentially make a significant impact towards  
131 ameliorating this nutritional crisis (Graham et al., 1999; Organization, 2002). Additional global  
132 health benefits could be achieved by increasing magnesium (Mg), selenium (Se), Ca and copper  
133 (Cu) (White and Broadley, 2005) and reducing the concentration of toxic elements, including  
134 arsenic (As) and Cd (Ma et al., 2008).

135 Seed element content is determined by interconnected biological processes, including  
136 element uptake by the roots, translocation and remobilization within the plant, and ultimately  
137 import, deposition and assimilation/storage in the seeds. Element availability is further affected  
138 by the accumulation of metabolites in seeds (Vreugdenhil et al., 2004). High-throughput ionic  
139 analysis, or concurrent measurement of multiple elements, allows for the quantitative and  
140 simultaneous measurement of an organism's elemental composition, providing a snapshot into  
141 the functional state of an organism under different experimental conditions (Salt et al., 2008).  
142 Most studies of the plant ionome utilize inductively-coupled plasma mass spectroscopy (ICP-  
143 MS). Briefly, the ICP functions to ionize the analyte into atoms, which are then detected by mass  
144 spectroscopy. Reference standards are utilized to quantify each element of interest in the sample  
145 analyte. ICP-MS analysis time is approximately 1-3 minutes per sample, which allows for a

146 high-throughput processing of hundreds of samples (Salt et al., 2008). Previous studies have  
147 demonstrated that several elements, including Fe, Mn, Zn, cobalt (Co) and Cd share mechanisms  
148 of accumulation (Yi and Guerinot, 1996; Vert et al., 2002; Connolly et al., 2003). Ionomics  
149 signatures derived from multiple elements have been shown to better predict plant physiological  
150 status than the measurements of the elements themselves, including the essential nutrients  
151 (Baxter et al., 2008). Holistically examining the ionome provides significant insights into the  
152 networks underlying ion homeostasis beyond single element studies (Baxter and Dilkes, 2012).

153 With over 45,000 catalogued sorghum germplasm lines (USDA), there is significant  
154 genetic variation (Das et al., 1997) with undiscovered impact on seed element composition.  
155 Mapping quantitative trait loci (QTL) for seed element concentration has been successful in a  
156 number of species including *Arabidopsis* (Vreugdenhil et al., 2004; Waters and Grusak, 2008;  
157 Buescher et al., 2010), rice (Norton et al., 2010; Zhang et al., 2014), wheat (Shi et al., 2008;  
158 Peleg et al., 2009) and maize (Šimić et al., 2012; Baxter et al., 2013; Baxter et al., 2014).  
159 Genome-wide association (GWA) mapping is well suited for uncovering the genetic basis for  
160 complex traits, including seed element accumulation. One of the key strengths of association  
161 mapping is that *a priori* knowledge is not necessary to identify new loci associated with the trait  
162 of interest. Further, a GWA mapping population is comprised of lines that have undergone  
163 numerous recombination events, allowing for a narrower mapping interval. Previous GWA  
164 studies in maize (Tian et al., 2011), rice (Huang et al., 2010) and sorghum (Morris et al., 2013)  
165 have been successful in identifying the genetic basis for various agronomic traits. Here, we  
166 analyzed the seed ionome from a community-generated association panel to identify potential  
167 loci underlying seed element accumulation in sorghum.

168

## 169 **Results:**

### 170 ***Phenotypic diversity for seed element concentrations in the sorghum association panel***

171 We grew 407 lines from the publicly available sorghum association panel (SAP) selected  
172 for genotypic diversity and phenotypic variation (Casa et al., 2008) (Supplemental table 1).  
173 These lines were previously genotyped by sequencing (GBS) (Morris et al., 2013). The SAP  
174 lines were grown in three experiments: Lubbock, Texas in 2008 (SAP 2008), Puerto Vallarta,  
175 Mexico in 2012 (SAP 2012), and two field replicates produced in Florence, SC in 2013 (SAP  
176 2013-1 and SAP2013-2). 287 of the 407 SAP lines were present in all 4 growouts.

177 Seed samples were taken from each replicate and weighed before analysis. A simple  
178 weight normalization and established methods to estimate weight from the elemental content  
179 were attempted (Lahner et al., 2003). However, both methods created artifacts, particularly in  
180 elements with concentrations near the level of detection (Supplemental figure 1). To address this  
181 concern, we included weight as a cofactor in a linear model that included other sources of  
182 technical error and utilized the residuals of the model as the trait of interest for genetic mapping.  
183 The residuals from this transformation were used for all further analyses and outperformed any  
184 other method (data not shown).

185 We calculated broad-sense heritability for each trait to determine the proportion of the  
186 phenotypic variation explained by the genetic variation present in the SAP across the three  
187 environments (Table 1). Heritability estimates ranged from 1% (sodium, Na) to 45% (Cu). We  
188 obtained moderate heritability (> 30%) for several elements including: Mg, P, sulfur (S),  
189 potassium (K), Ca, Mn, Fe, Co, Zn, strontium (Sr) and molybdenum (Mo). Low heritabilities  
190 were reported previously for seed accumulation of Al and As (Norton et al., 2010) as well as for  
191 Se, Na, Al, and Rb in a similarly designed study in maize seed kernels (Baxter et al., 2014). The  
192 relatively lower heritabilities for these elements, including boron (B), Cd and Se could be  
193 explained by environmental differences between the experiments, element accumulation near the  
194 limits of detection via ICP-MS, or the absence of genetic variation affecting these element's  
195 concentrations. Consistent with the hypothesis that field environment was masking genetic  
196 variation, we calculated the heritability for two field replicates of the SAP in 2013, and found  
197 higher heritabilities for 12 elements (Table 1).

198 We detected significant effects of both genotype and environment on most of the  
199 elements (Figure 1 and Supplemental table 2). The measured element concentrations of the  
200 present study corroborate the broad range observed in the sorghum element literature (Mengesha,  
201 1966; Neucere and Sumrell, 1980; Lestienne et al., 2005; Ragae et al., 2006). Similar to a study  
202 carried out in wild emmer wheat (Gomez-Becerra et al., 2010), grain Na and Ca showed large  
203 variation (5 and 4 fold, respectively). Compared to micronutrients, the remaining macronutrients  
204 (P, K, S and Mg) measured in the study exhibited less phenotypic variation overall (Table 1 and  
205 Supplemental table 3) ranging between 1.6 and 1.8 fold across the SAP. Of the micronutrients,  
206 high variation was detected for Al and Ni (8 and 6 fold, respectively). With the exception of  
207 these two elements, seed micronutrient concentration showed phenotypic variation ranging

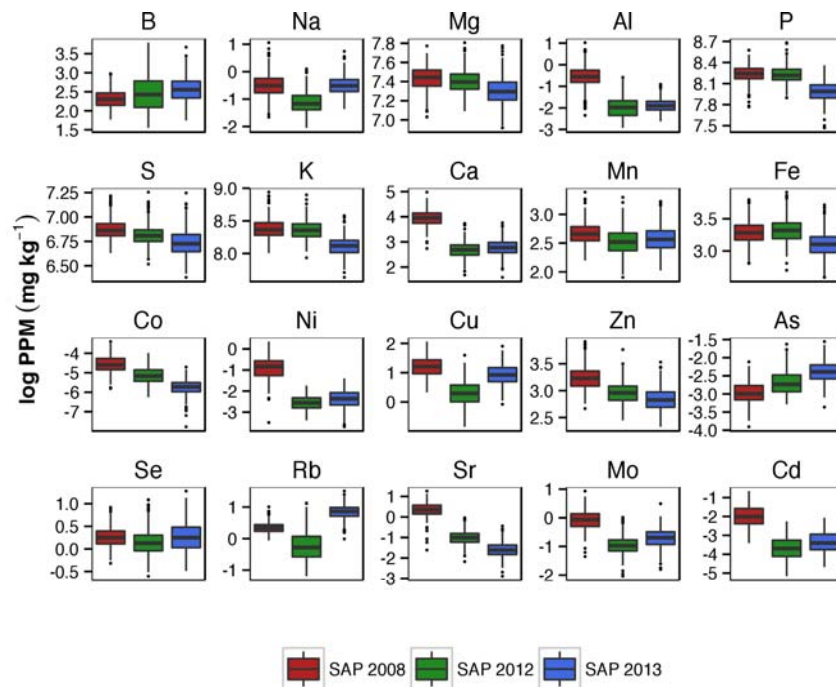

**Figure 1** Box plots with median, minimum and maximum values, and interquartile ranges for the 20 elements in three SAP experimental populations. The raw concentration values for each of the elements were log transformed to obtain normally distributed phenotypes.

208 between 2.4 to 5.6 fold. High variation in Ni and Al may indicate strong environmental effects  
209 on grain Ni and Al concentration or contamination during handling and analysis of the seeds, as  
210 previously suggested (Baxter et al., 2014). The element traits were well distributed across the  
211 sorghum subpopulations, with no specific subpopulations accumulating disproportionate levels  
212 of any element (Supplemental figure 2).

213 We used two different approaches to identify the shared regulation of elemental  
214 accumulation. Pairwise correlations were calculated and graphed (Supplemental table 4 and  
215 Figure 2a), and principal component analysis (PCA) was carried out (Figure 2b). Highly  
216 correlated element pairs in our data included Mg-P, Mg-Mn, P-S and Mg-S. Divalent cations  
217  $\text{Ca}^{2+}$  and  $\text{Sr}^{2+}$  are chemical analogs and strong correlation was observed between these two  
218 elements, consistent with previous reports in other species (Queen et al., 1963; Hutchin and  
219 Vaughan, 1968; Ozgen et al., 2011; Broadley and White, 2012). In the SAP, the first two  
220 principal components accounted for a large fraction of the phenotypic covariance (36%).  
221 Clustering of elements reflected known elemental relationships, including the covariation of Ca  
222 and Sr (Figure 2). A cluster of the essential metal micronutrients, Fe, Zn and Cu is  
223 distinguishable suggesting that their accumulation can be affected by a shared mechanism.



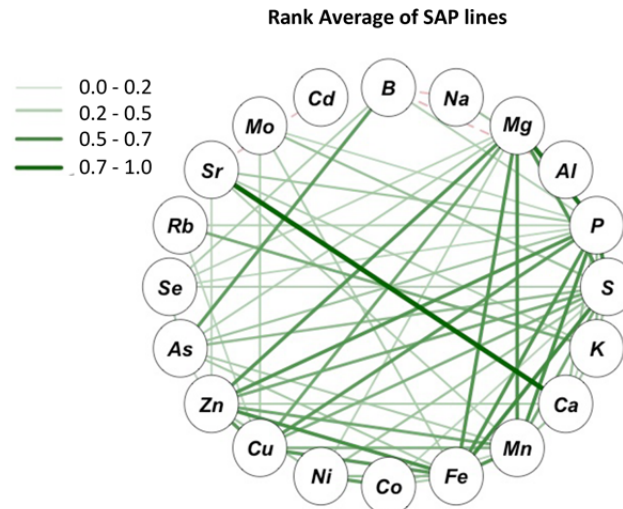

**Figure 2A** Correlation network of seed element concentrations using rank average data calculated across replicates from SAP association panels. Green solid lines represent positive correlation values. Red dashed lines represent negative correlation values. Intensity and thickness of lines indicate degree of correlation. Element correlation values can be found in Supplemental table 4. Correlation networks for SAP 2008, SAP 2012, and SAP 2013 can be found in Supplemental figure 3.

224 Similarly clustering of Mg and P is consistent with previous studies in wheat (Peleg et al., 2009).

225 Seed P is predominately stored as the Mg<sup>2+</sup> salt of phytic acid (inositol-hexaphosphate; IP<sub>6</sub>),

226 which may explain the significant positive correlation of these elements (Maathuis, 2009;

227 Marschner and Marschner, 2012).

228

### 229 *Genome-wide association mapping of seed element traits*

230 To dissect the genetic basis of natural variation for seed element concentration in  
231 sorghum seed, GWA mapping was performed using both an optimal model obtained from the  
232 multi-locus mixed model (MLMM) algorithm and a compressed mix linear model (CMLM) that  
233 accounts for population structure. For the MLMM analysis we considered several models to  
234 account for population structure as well as two different models to determine how many  
235 cofactors to add into the analysis (see Methods and Supplemental figure 5). We decided to use  
236 the kinship model to account for population structure and the most conservative mBonf model  
237 for selecting cofactors. We also used the conservative, Bonferroni-corrected threshold ( $P = 0.05$ )  
238 for CMLM, and identified overlapping SNPs significantly associated with seed element  
239 concentration using both approaches (Supplemental tables 5 and 6). Compared to traditional

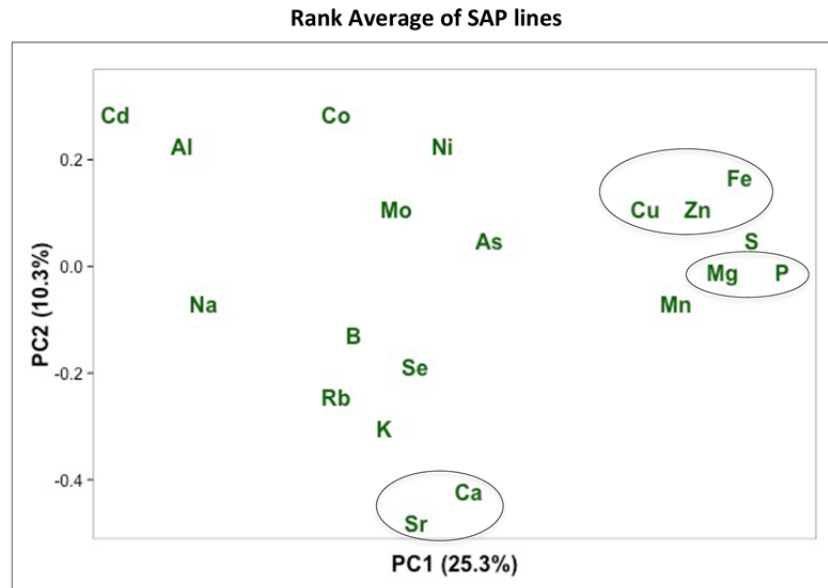

**Figure 2B** Principal component analysis applied to the rank average seed concentrations for 20 elements in the SAP lines across experiments. Each symbol represents a single element. PCA analysis for SAP 2008, SAP 2012 and SAP 2013 can be found in Supplemental figure 4. Outlined elements reflect clustering of known elemental relationships

240 single-locus approaches (e.g. CMLM), MLMM utilizes multiple loci in the model, which  
241 contribute to a higher detection power and lower potential of false discoveries (Segura et al.,  
242 2012). MLMM also identified additional associations of interest. Significant SNPs identified  
243 with the MLMM approach were prioritized for further analysis (Supplemental table 5).

244 In an effort to comprehensively identify significant SNPs associated with element  
245 concentration, we created several datasets for GWA analysis. After averaging the two SAP 2013  
246 growouts, each location was treated as an individual experiment. To link SAP experiments  
247 across environments, we ranked the individual lines of each experiment by element  
248 concentration and derived a robust statistic describing element accumulation for GWAS by using  
249 the average of ranks across the four SAP environments. By utilizing rank-order, we eliminated  
250 skewness and large variation in element concentration due to environmental differences  
251 (Conover and Iman, 1981). GWA scans across individual experiments identified 270, 228, and  
252 207 significant SNPs for all twenty element traits in the SAP2008, SAP2012 and SAP2013  
253 panels, respectively. In total we identified 255 significant loci in the ranked dataset for the  
254 twenty element traits (Supplemental table 5). The number of significant SNPs per element trait  
255 ranged from two (B) to 33 (Ca) and roughly reflected their heritabilities.

256 We identified several SNPs common to multiple environments (Supplemental table 8).  
257 For example, GWA for Ca concentration in all three of our SAP experiments identified  
258 significant SNPs within 5kb of locus Sobic.001G094200 on chromosome 1. Sobic.001G094200  
259 is a putative calcium homeostasis regulator (CHoR1) (Zhang et al., 2012). We also identified  
260 several significant SNPs that colocalized for multiple element traits (Figure 3 and Supplemental  
261 table 9). Several of these SNPs were detected as significantly associated with multiple elements  
262 that are known to be coordinately regulated (Yi and Guerinot, 1996; Vert et al., 2002; Connolly  
263 et al., 2003; Lahner et al., 2003), and implicate candidate genes involved in regulation of  
264 multiple elements. For example, a SNP on chromosome 1 (S1\_18898717) was a significant peak  
265 in both Mg and Mn GWA analysis (Figure 3). This SNP peak is in LD with the Arabidopsis  
266 homolog of AT3G15480. AT3G15480 is a protein of unknown function, however T-DNA  
267 knockout lines display mutant phenotypes in both Mg and Mn accumulation  
268 ([www.ionomicshub.org](http://www.ionomicshub.org), SALK\_129213, Tray 449). T-DNA knockout lines in Arabidopsis also  
269 validated the significant peak for Co accumulation in the present study (S2\_8464347). This SNP  
270 is linked to the homolog of AT5G63790, a NAC domain containing protein that imparts a  
271 significantly decreased Co phenotype in the T-DNA knockout line ([www.ionomicshub.org](http://www.ionomicshub.org),  
272 SALK\_030702, Tray 1137).

273 We focused our interpretation efforts on the GWA results from the SAP ranked dataset,  
274 as these are the most likely to provide the tools to manipulate seed element content across  
275 multiple environments. The GWA results for each element trait obtained at the optimal step of  
276 the MLM model were compiled. The data for Cd using the SAP ranked dataset is presented in  
277 Figure 4 as an example of the analysis procedure. GWA across multiple environments identified  
278 one significant SNP (S2\_8883293) associated with Cd levels. (Figure 4A). The distribution of  
279 expected vs. observed P values, QQ-plots (Figure 4B and Supplemental figure 5), suggests that  
280 population structure was well controlled and false positive association signals were minimized  
281 using the kinship matrix plus cofactors.

282 The optimal MLM model (mBof) included one SNP on chromosome 2, S2\_8883293,  
283 that explained 18% of the phenotypic variation in cadmium (Figure 4C), and the allelic effects of  
284 each genotype were estimated (Figure 4D). The major-effect locus on chromosome 2 is in LD  
285 with a homolog of a well-characterized cadmium transporter in plants, heavy metal ATPase 2  
286 (HMA2).

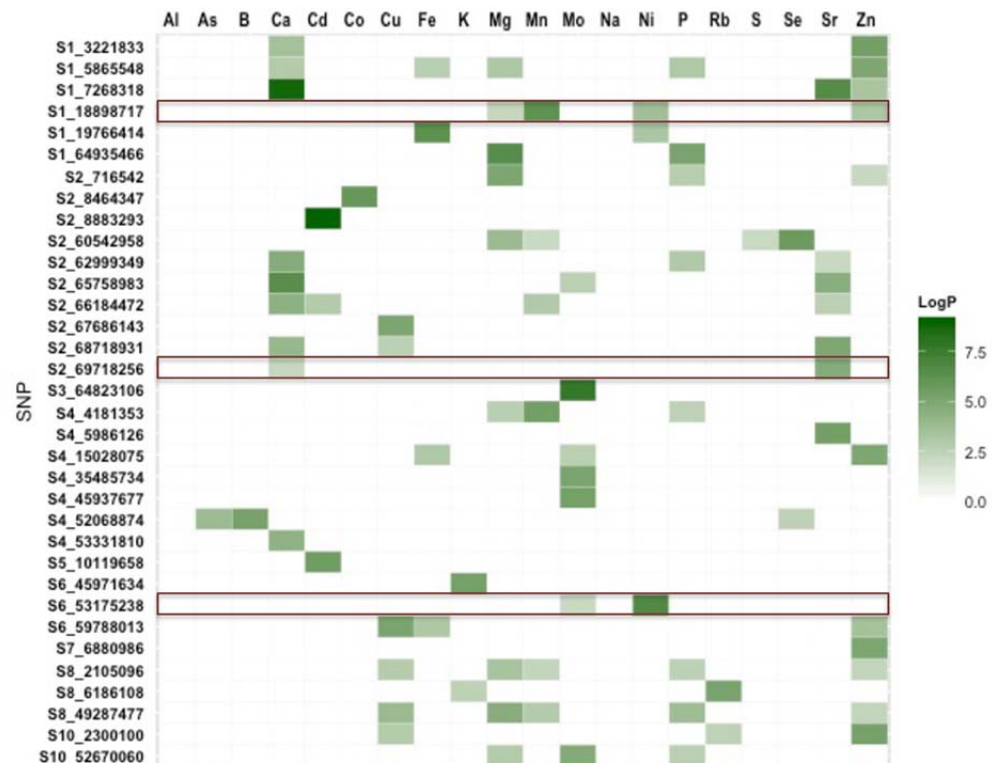

**Figure 3** Heatmap displaying the Log P values of shared significant SNPs across 20 elements in the rank average dataset. Significance values below 2 are white and the ranges from 2.01 to 9.01 are shown in green (light to dark green color). Outlined in red are biologically relevant SNPs that colocalized for multiple elements.

287

## 288 Discussion:

### 289 *Ionome profiling for improved sorghum seed quality*

290 Increasing the concentration of elements essential for human and animal nutrition (e.g. Fe  
291 and Zn) while simultaneously minimizing and increasing tolerance to anti-nutrients and toxic  
292 elements (e.g. As, Cd and Al) is a significant goal of fundamental research directed towards  
293 global crop improvement (Schroeder et al., 2013). Element homeostasis in plants, is affected by  
294 genotype, environment, soil properties, and nutrient interactions (Gregorio et al., 2000).  
295 While determining strategies to enhance or reduce element content for food or fuel, several  
296 components of seed element traits must be considered. These include: the heritability of the  
297 various element traits, genotype by environment interactions, and the availability of high-  
298 throughput element content screening tools (Ortiz-Monasterio et al., 2007). Differences in seed  
299 organic composition can also have large effects on the element composition of seeds, as different  
300 seed compartments will contain elements in different proportions. Variation in seed composition

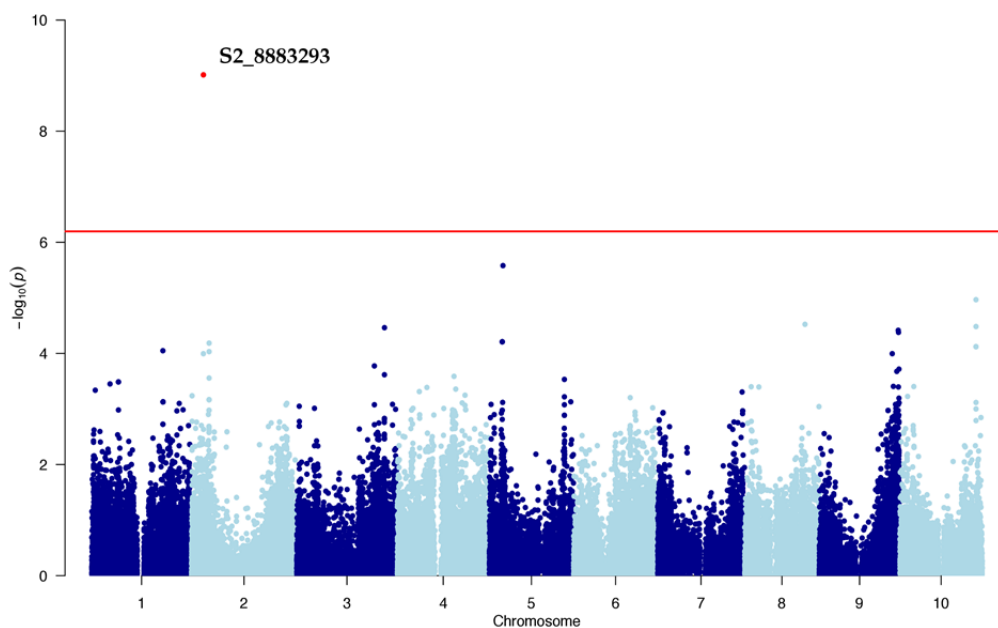

**Figure 4A** Manhattan plot displaying Cd GWAS results ( $-\log_{10}(P)$ ) for the 10 sorghum chromosomes (x-axis) and associated  $p$  values for each marker (y-axis). The red lines indicate a Bonferroni-corrected threshold of 0.05.

301 together with variation in sorghum seed sizes, violate the assumption of a uniform elemental  
302 concentration inherent in simple weight normalizations. Our data were not well modeled by a  
303 simple weight normalization (Supplemental figure 1), and we subsequently employed a rank  
304 transformation of the phenotypic data and linear model in the analysis (Ayana and Bekele, 2000;  
305 Baxter et al., 2014).

306 Our results demonstrate environmental effects on the range and means of element  
307 concentrations are largely element specific. In general, seed element concentrations did not  
308 exhibit large variation due to environmental effects. This contributed to high heritabilities for  
309 several elements and homeostasis of individual element concentration across very diverse  
310 environments (Figure 1 and Table 1). The high heritabilities for these traits demonstrate the  
311 feasibility of breeding strategies for the improvement of sorghum for seed element accumulation.  
312 Further, due to the known genetic contributors to trait covariation, selection strategies can  
313 include alteration of multiple traits, phenotypic correlations between traits or counter selection  
314 for undesirable traits (e.g. As accumulation). The high heritability and the relationships we report  
315 between important element elements, including Fe and Zn are encouraging for the development  
316 of breeding schema for improved element profiles for the alleviation of human malnutrition.  
317 Observed correlations of several elements indicate that changes in one or more elements can

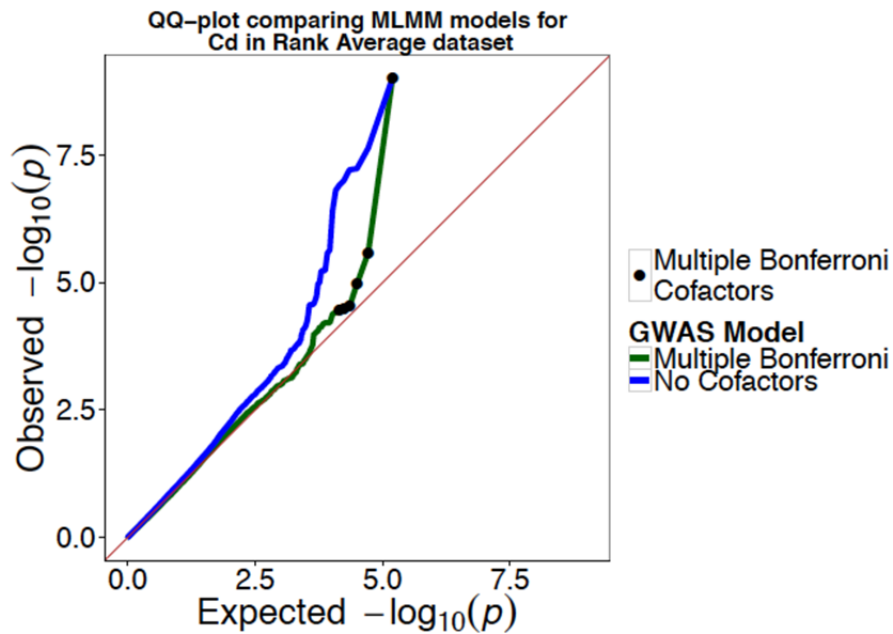

**Figure 4B** Quantile-quantile (QQ) of observed  $p$  values against the expected  $p$  values from the GWAS analysis for Cd element concentration. The MLMM mixed model includes cofactors that reduce inflation of  $p$  values (green line). The null model that does not consider significant cofactors, indicating the presence of  $p$  value inflation (blue line). The grey line indicates the expected  $p$  value distribution under the null hypothesis.

318 simultaneously affect the concentration of other elements present in the seed (Figure 2A).

319 However, the individual effects of particular alleles can deviate from this pattern.

320 Trait correlations and covariation were used to uncover genetic associations for multiple  
321 elements. Even without more complicated analyses, we detected colocalized effects on several  
322 element traits (Supplemental table 4 and Supplemental table 8). For example, several significant  
323 SNPs colocalized for the strongly correlated element pairs of Ca and Sr ( $r=0.79$ ) as well as Mg  
324 and P ( $r=0.71$ ). Shared SNPs and colocalization of significant loci across multiple element traits  
325 suggest the possibility of tightly-linked genes or genes with pleiotropic effects and has been  
326 documented in recent GWA studies, including experiments in tomato (Sauvage et al., 2014) and  
327 rice (Zhao et al., 2011). In the present analysis, we applied a conservative threshold in our  
328 MLMM implementation and identified SNPs from the most complex model in which the P  
329 values of cofactors were below a defined threshold of 0.05. We implemented stringent  
330 parameters to eliminate false positives, but also risked the elimination of true positives. To  
331 identify additional candidate SNPs for further investigation, these stringent parameters can be  
332 relaxed to include association signals below the threshold.

333



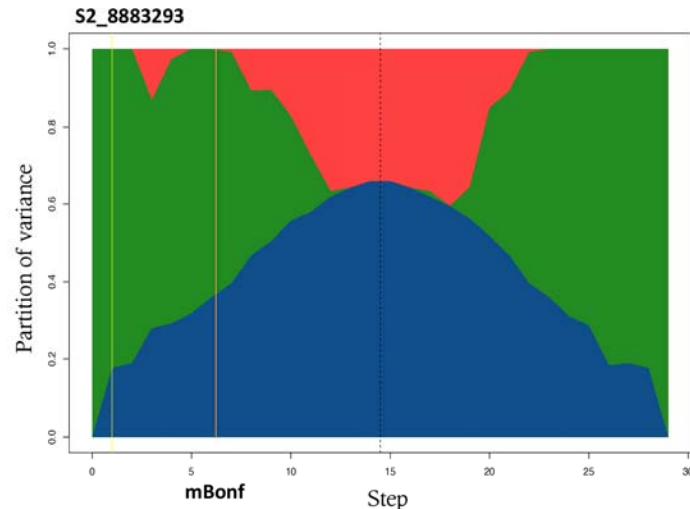

**Figure 4C** Evolution of genetic variance at each step of the MLM (blue, genetic variance explained; green, total genetic variance; red, error). The yellow line indicates the variance with the inclusion of S2\_8883293. The orange line indicates the optimal model selected by the multiple bonferroni criterion (mBonf).

334 **Candidate genes**

335 One of the primary goals of this study was to utilize GWA analyses to identify candidate  
336 genes and novel loci implicated in the genetic regulation of sorghum seed element traits. We  
337 identified numerous significant SNPs for all twenty element traits that currently do not associate  
338 with known elemental accumulation genes. Although it is likely that a small fraction of these  
339 SNPs are false positives, many more may be novel associations with as-yet undiscovered causal  
340 genes and merit further investigation. We did, however, identify several significant SNPs that  
341 fall directly within a characterized candidate gene or are in close proximity, or LD, with putative  
342 candidates.

343 **Zinc**

344 Zinc deficiency is a critical challenge for food crop production that results in decreased  
345 yields and nutritional quality. Zinc-enriched seeds result in better seedling vigor and higher stress  
346 tolerance on Zn-deficient soils (Cakmak, 2008). Here we identify a strong candidate for genetic  
347 improvement of zinc concentration in the in sorghum seed, Sobic.007G064900, an ortholog of  
348 Arabidopsis ZIP5, zinc transporter precursor (AT1G05300) (Table 2). AT1G05300 is a member  
349 of the ZIP family of metal transporter genes, and overexpression lines of this gene display  
350 increased Zn accumulation in Arabidopsis ([www.ionomicshub.org](http://www.ionomicshub.org), 35SZip5\_2 \_Tray 700).

351 **Manganese**

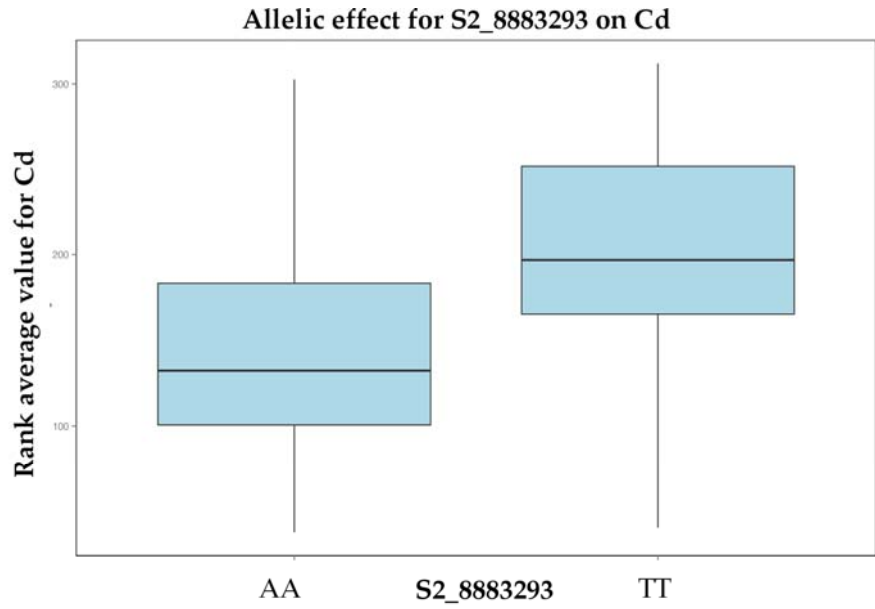

**Figure 4D Allelic effect for the Cd significant SNP marker on chromosome 2.**

352 Associated with amino acid, lipid and carbohydrate metabolism, Mn is one of the  
353 essential elements critical to human and animal nutritional requirements (Aschner and Aschner,  
354 2005). We identified significant GWAS associations in the putative sorghum homolog for  
355 member of the metal transporter encoding cation diffusion facilitator gene family MTP11  
356 (Sobic.003G349200) (Table 2). The Arabidopsis ortholog, AtMTP11, confers Mn tolerance and  
357 transports Mn<sup>2+</sup> via a proton-antiport mechanism in *Saccharomyces cerevisiae* (Delhaize et al.,  
358 2007).

359 **Cadmium**

360 The seeds are a major source of essential nutrients, but can also be a source of toxic  
361 heavy metals, including cadmium. Contamination of ground water and subsequent uptake and  
362 absorption by the plant can result in high levels of Cd contamination in the seed (Arao and Ae,  
363 2003). GWA analysis identified significant SNPs associated with a paralogous set of cation-  
364 transporting ATPases (Figure 4), Sobic.002G083000 and Sobic.002G083100. These are sorghum  
365 orthologs of Arabidopsis HMA genes in the heavy metal-transporting subfamily of the P-type  
366 ATPases. AtHMA3 participates in the vacuolar storage of Cd in Arabidopsis, and a recent study



367 revealed that HMA3 is a major-effect locus controlling natural variation in leaf cadmium (Morel  
368 et al., 2009; Chao et al., 2012). The SNP alleles could be used immediately to potentially  
369 produce sorghum seed with lowered Cd<sup>2+</sup> accumulation.

### 370 *Nickel*

371 Ni is an essential nutrient required for plant growth. However, similar to Cd, high Ni  
372 concentrations in soil can be toxic to the plant, resulting in reduced biomass and crop yield. The  
373 most significant SNP for Ni concentration in the SAP 2008 environment (and present in SAP  
374 2012 and the ranked dataset) was S6\_53175238. This SNP is in LD with the candidate gene  
375 Sobic.006G164300, a homolog of the Yellow Stripe-Like 3 (YSL) family of proteins (Table 2).  
376 Originally identified in maize, the YSL proteins are a subfamily of oligopeptide transporters  
377 involved in metal uptake, homeostasis and long-distance transport (Curie et al., 2009). YSL3 is  
378 suggested to transport metals bound to nicotianamine (NA)(Curie et al., 2001) and in the metal  
379 hyperaccumulator *Thlaspi caerulescens* YSL3 functions as Ni–NA influx transporter (Gendreau et  
380 al., 2007).

381

### 382 **Summary/Conclusion:**

383 In the present study, we utilized GWA mapping and rank transformation of the  
384 phenotypic data to scale GxE interactions and identify a number of genetic loci and candidate  
385 gene associations for immediate study and application to breeding strategies. The use of a multi-  
386 element, or ionomic approach, to the analysis allows for the identification of SNPs that confer  
387 multiple advantageous traits that can be selected for in breeding programs. We identify co-  
388 localization of significant SNPs for different elements, indicating potential coregulation through  
389 physiological processes of elemental uptake, transport, traffic and sequestration. Our results  
390 suggest that combining elemental profiling with GWA approaches can be useful for  
391 understanding the genetic loci underlying elemental accumulation and for improving nutritional  
392 content of sorghum. The data and analysis scripts used for this publication can be found at  
393 [www.ionomicshub.org](http://www.ionomicshub.org).

394

### 395 **Materials and Methods:**

396 *Plant material*

397 The Sorghum Association Panel has been previously described (Casa et al., 2008). Seeds  
398 harvested from 407 lines that comprise the Sorghum Association Panel (SAP) were utilized for  
399 this study. The SAP 2008 seeds were obtained from Germplasm Resources Information Network  
400 (GRIN) and were produced in Lubbock, Texas by the USDA-ARS Cropping Systems Research  
401 Laboratory in 2008. The SAP 2012 seeds were produced in Puerto Vallarta, Mexico in 2012. The  
402 SAP 2013 seeds were produced in Florence, SC in 2013.

403

#### 404 *Phenotypic Elemental Analysis*

405 Four seeds per replicate were weighed from each individual and a minimum of two replicates  
406 from each line of the SAP 2008 and SAP 2013 panels were analyzed by ICP-MS. Each sample  
407 was digested with 2.5 mL of concentrated nitric acid at 95°C for 3 hours. Elemental analysis  
408 was performed with an ICP-MS for B, Na, Mg, Al, P, S, K, Ca, Mn, Fe, Co, Ni, Cu, Zn, As, Se,  
409 Rb, Sr, Mo and Cd following established protocols (Baxter et al., 2010). A reference sample  
410 derived from a pool of sorghum seed samples was generated and run after every 9<sup>th</sup> sample to  
411 correct for ICP-MS run-to-run variation and within-run drift.

412

#### 413 *Data Processing and Analysis*

414 Phenotype data were generated for 407 SAP lines. GBS SNP markers for the SAP lines used in  
415 this study have been previously described (Morris et al., 2013). After removing SNPs with more  
416 than 20% missing data and minor allele frequencies below 0.05, genotype data for 78,012 SNPs  
417 remained. Broad sense heritability was calculated using the lmer function in the lme4 package to  
418 perform an analysis of variance with the experimental replicates of the SAP using previously  
419 described methods (Van Poecke et al., 2007; Bates et al., 2014). To ensure normality in the data  
420 distribution of the phenotype, the Box-Cox procedure was carried out on the phenotype scores to  
421 identify the best transformation method (Box and Cox, 1964). The ‘boxcox’ function in the  
422 MASS package in R was utilized to carry out the transformations (R Development Core Team,  
423 2014; Ripley et al., 2014). In order to address potential confounding factors in the GWA  
424 analysis, specifically ICP run-to-run variation and the weight correction calculation, we used  
425 linear regression to compute residuals adjusted for ICP run and sample weight. These residuals  
426 were used to test for association with qualifying SNPs in the GWA analysis.

427

428 GWAS

429 GWAS was executed in R using Genomic Association and Prediction Integrated Tool  
430 (GAPIT) using CMLM (Zhang et al., 2010; Lipka et al., 2012). Significant associations were  
431 determined by estimates of false discovery rate (FDR) ( $P = 0.05$ ) (Benjamini and Hochberg,  
432 1995). The CMLM uses a VanRaden kinship matrix and the first three principal components as  
433 covariates to account for population structure. MLMM is based on EMMA (Kang et al., 2008)  
434 and relies on the iterative use of a simple K, or Q+K, mixed-model algorithm. The kinship term,  
435 K, provides a fine-grained estimate of familial relatedness between lines. In addition, GWAS  
436 models often include a more granular measurement of population membership for each line, Q.  
437 To determine the necessity of using the more complex Q+K model to control for spurious allele  
438 associations, we analyzed QQ-plots generated from MLMM GWAS using a simple K model plus  
439 cofactors (Supplemental figure 5) and phenotypic distributions across known subpopulations  
440 (Supplemental figure 2). Phenotypic distributions across subpopulations were similar, indicating  
441 that population structure does not play a strong role in elemental accumulation. The QQ-plots  
442 indicate that after the addition of major effect loci to the model as cofactors, the  $p$  value  
443 distribution does not deviate drastically from the expected uniform distribution. These results  
444 indicate that for MLMM the mixed model containing only the kinship matrix, K, plus cofactors  
445 is sufficient to control for spurious allele associations due to population structure and cryptic  
446 relatedness.

447 At each step of the MLMM, the phenotypic variance is divided into genetic, random and  
448 explained variance. The most significant marker is included as a cofactor, and the variance  
449 components of the model are recalculated. With each successive iteration, the remaining genetic  
450 variance approaches zero, and an optimal model including cofactors that explains the genetic  
451 fraction of the phenotypic variance is determined. The MLMM method selects two models using  
452 stop criteria determined by two test statistics termed the multiple-Bonferroni criterion (mBonf)  
453 and the extended Bayesian information criterion (extBIC). The mBonf criteria selects a model  
454 wherein all cofactors have a  $p$  value below a Bonferroni-corrected threshold (Segura et al., 2012)  
455 and, in our experiments, this was the more stringent of the two model selection criteria (i.e. it  
456 favored less complex models) and was used for all further analyses. In addition, the genetic  
457 variance partition, described above, provides an estimate of heritability, termed  
458 pseudoheritability (Kang et al., 2010; Segura et al., 2012), explained by the model at each step.

459 The missing heritability can be calculated from the model at the optimal step (mBonf). The  
460 percent variance explained by the model is the difference between the genetic variance at step 0  
461 and the optimal step (Supplemental table 7).

462 The MLM method utilized the multiple-Bonferroni criterion (mBonf) which selects a  
463 model wherein all cofactors have a  $p$  value below a Bonferroni-corrected threshold (Segura et al.,  
464 2012). We utilized a genome-wide significance threshold of  $p < 0.05$  for the Bonferroni  
465 correction. A kinship matrix was constructed to correct for population structure and cryptic  
466 relatedness (Supplemental table 10). The kinship matrix was estimated from all of the SNPs in  
467 the dataset using the VanRaden method (VanRaden, 2008) in GAPIT (Lipka et al., 2012).  
468 Kinship was included as a random effect in the MLM model.

469

## 470 **Supplemental Material**

471 **Supplemental figure 1:** Correlation between seed weight and elemental concentration

472 **Supplemental figure 2:** Element distribution across sorghum subpopulations

473 **Supplemental figure 3:** Correlation network of seed element concentrations

474 **Supplemental figure 4:** PCA applied to the average seed concentrations for 20 elements

475 **Supplemental figure 5:** QQ Plots comparing MLM models

476 **Supplemental table 1:** SAP lines

477 **Supplemental table 2:** Summary of one-way ANOVA for each evaluated trait and environment

478 **Supplemental table 3:** Means and standard deviations of seed element concentrations

479 **Supplemental table 4:** Correlation coefficients among seed element concentrations

480 **Supplemental table 5:** Significant SNPs identified by MLM

481 **Supplemental table 6:** Significant SNPs identified by CMLM

482 **Supplemental table 7:** Calculations from MLM-Pseudoheritability

483 **Supplemental table 8:** Shared significant SNPs across SAP datasets

484 **Supplemental table 9:** Significant SNPs shared for multiple elements

485 **Supplemental table 10:** Kinship matrix estimated from all of the SNPs

486

## 487 **Acknowledgments**

488 This project was partially funded by the iHUB Visiting Scientist Program

489 (<http://www.ionomicshub.org>), Chromatin, Inc., NSF EAGER (1450341) to I.B. and B.P.D.,

490 NSF IOS 1126950 to I.B., NSF IOS-0919739 to E.C., and BMGF (OPP 1052924) to B.P.D.

491 **Availability of supporting data**

492 The datasets supporting the results of this article are available through Purdue Ionomics  
493 Information Management System (PiiMS) at <http://www.ionomicshub.org>

494

495 **Competing interests**

496 The authors declare that they have no competing interests.

497

498 **Authors' contributions**

499 NS, GZ and IB wrote the manuscript, carried out ionomics assays, data analysis and  
500 interpretation of the results. ZB and RB contributed to experimental design and participated in  
501 tissue sampling. BD, EC, and SK participated in data analysis and interpretation of the results.  
502 All authors read, revised and approved the final manuscript.

503

504

505

506

507

508

509

510

511

512

513

514

515

516  
517  
518  
519  
520  
521  
522  
523  
524  
525  
526  
527  
528  
529  
530  
531  
532  
533  
534  
535  
536  
537  
538  
539  
540  
541  
542  
543  
544  
545  
546  
547  
548  
549  
550

| Trait     | Sorghum Association Panel |                    | H <sup>2</sup> | H <sup>2</sup> |
|-----------|---------------------------|--------------------|----------------|----------------|
|           | All SAP Replicates        |                    | All SAP        | 2013 Field     |
|           | Mean                      | Standard Deviation | Reps           | Reps           |
| <b>B</b>  | 12.8                      | 5.88               | 0.02           | 0.05           |
| <b>Na</b> | 0.572                     | 0.316              | 0.01           | 0.00           |
| <b>Mg</b> | 1580                      | 246                | 0.42           | 0.38           |
| <b>Al</b> | 0.277                     | 0.269              | 0.06           | 0.17           |
| <b>P</b>  | 3350                      | 623                | 0.38           | 0.35           |
| <b>S</b>  | 890                       | 127                | 0.36           | 0.33           |
| <b>K</b>  | 3850                      | 795                | 0.36           | 0.46           |
| <b>Ca</b> | 25.3                      | 18.8               | 0.41           | 0.57           |
| <b>Mn</b> | 13.5                      | 3.33               | 0.36           | 0.43           |
| <b>Fe</b> | 24.9                      | 5.7                | 0.40           | 0.46           |
| <b>Co</b> | 6.11*                     | 4.48*              | 0.32           | 0.28           |
| <b>Ni</b> | 0.18                      | 0.187              | 0.22           | 0.10           |
| <b>Cu</b> | 2.54                      | 1.21               | 0.45           | 0.47           |
| <b>Zn</b> | 19.9                      | 5.71               | 0.35           | 0.38           |
| <b>As</b> | 0.0796                    | 0.0361             | 0.08           | 0.19           |
| <b>Se</b> | 1.32                      | 0.454              | 0.03           | 0.00           |
| <b>Rb</b> | 1.76                      | 0.848              | 0.10           | 0.12           |
| <b>Sr</b> | 0.573                     | 0.586              | 0.32           | 0.27           |
| <b>Mo</b> | 0.603                     | 0.306              | 0.33           | 0.37           |
| <b>Cd</b> | 0.0683                    | 0.0739             | 0.16           | 0.23           |

**Table 1** Mean, standard deviation, and broad sense heritability of seed element concentrations from the Sorghum Association Panel averaged across 3 environments. Element concentration values are presented as mg kg<sup>-1</sup> and broad sense heritability (H<sup>2</sup>) was calculated as described in the methods section. Data represents an average of individual samples (n=287) analyzed in 4 separate experiments. \*Element concentration presented in µg kg<sup>-1</sup>.

| <i>Phenotype</i> | <i>SNP</i>  | <i>Locus Name</i> | <i>Chromosome</i> | <i>P value</i> | <i>Soybean Defline Annotation</i>                | <i>Arabidopsis thaliana Homolog</i>           |
|------------------|-------------|-------------------|-------------------|----------------|--------------------------------------------------|-----------------------------------------------|
| Cd               | S2_8883293  | Sobic.002G083000  | 2                 | 9.67E-10       | Cation-transporting ATPase                       | <i>AtHMA2</i> ; Heavy Metal ATPase2           |
| Mo               | S3_64823106 | Sobic.003G320600  | 3                 | 1.65E-08       | Membrane protein-like                            | Sulfite exporter TauE/SafE family protein     |
| Ni               | S6_53175238 | Sobic.006G164300  | 6                 | 1.84E-07       | Iron transport protein 2                         | <i>AtYSL3</i> ; YELLOW STRIPE like 3          |
| Mg               | S1_64935466 | Sobic.001G443900  | 1                 | 3.20E-07       | Peptide transporter PTR2, putative, expressed    | <i>AtPTR2</i> ; Peptide transporter 2         |
| Fe               | S1_19766414 | Sobic.001G213400  | 1                 | 4.92E-07       | HD domain containing protein, expressed          | Metal-dependent phosphohydrolase              |
| K                | S6_45971634 | Sobic.006G082200  | 6                 | 4.25E-06       | OSIGBa0160I14.4 protein                          | MGT4, MRS2-3; Magnesium transporter 4         |
| B                | S4_52068874 | Sobic.004G174600  | 4                 | 5.45E-06       | Putative multidrug resistance protein            | ABC transporter family protein                |
| Rb               | S8_6186108  | Sobic.008G058700  | 8                 | 7.06E-06       | Putative uncharacterized protein OSJNBa0065C11.1 | ZIP metal ion transporter family              |
| P                | S1_64935466 | Sobic.001G443900  | 1                 | 7.14E-06       | Peptide transporter PTR2, putative, expressed    | <i>AtPTR2</i> ; Peptide transporter 2         |
| Zn               | S7_6880986  | Sobic.007G064900  | 7                 | 8.11E-06       | Zinc transporter                                 | <i>ZIP5</i> ; Zinc transporter 5 precursor    |
| Sr               | S4_5986126  | Sobic.004G073500  | 4                 | 8.96E-06       | Putative multidrug resistance protein            | ABC transporter family protein                |
| Mn               | S3_66960028 | Sobic.003G349200  | 3                 | 6.37E-05       | Cation efflux family protein                     | <i>MTP11</i> ; ABC transporter family protein |

551  
552  
553  
554  
555  
556  
557

**Table II** Detailed information for selected significant associations detected within the 20 element traits analyzed using the MLM.



558 **Literature Cited:**

- 559 **Amaducci S, Monti A, Venturi G** (2004) Non-structural carbohydrates and fibre  
560 components in sweet and fibre sorghum as affected by low and normal input  
561 techniques. *Industrial Crops and Products* **20**: 111-118
- 562 **Arao T, Ae N** (2003) Genotypic variations in cadmium levels of rice grain. *Soil Science and*  
563 *Plant Nutrition* **49**: 473-479
- 564 **Aschner JL, Aschner M** (2005) Nutritional aspects of manganese homeostasis. *Molecular*  
565 *aspects of medicine* **26**: 353-362
- 566 **Ayana A, Bekele E** (2000) Geographical patterns of morphological variation in sorghum  
567 (*Sorghum bicolor* (L.) Moench) germplasm from Ethiopia and Eritrea: quantitative  
568 characters. *Euphytica* **115**: 91-104
- 569 **Bates D, Mächler M, Bolker B, Walker S** (2014) Fitting linear mixed-effects models using  
570 lme4. arXiv preprint arXiv:1406.5823
- 571 **Baxter I, Brazelton JN, Yu D, Huang YS, Lahner B, Yakubova E, Li Y, Bergelson J,**  
572 **Borevitz JO, Nordborg M** (2010) A coastal cline in sodium accumulation in  
573 *Arabidopsis thaliana* is driven by natural variation of the sodium transporter  
574 *AtHKT1*; 1. *PLoS genetics* **6**: e1001193
- 575 **Baxter IR, Gustin JL, Settles AM, Hoekenga OA** (2013) Ionomics characterization of maize  
576 kernels in the intermated B73× Mo17 population. *Crop Science* **53**: 208-220
- 577 **Baxter IR, Vitek O, Lahner B, Muthukumar B, Borghi M, Morrissey J, Guerinot ML, Salt**  
578 **DE** (2008) The leaf ionome as a multivariable system to detect a plant's  
579 physiological status. *Proceedings of the National Academy of Sciences* **105**: 12081-  
580 12086
- 581 **Baxter IR, Ziegler G, Lahner B, Mickelbart MV, Foley R, Danku J, Armstrong P, Salt DE,**  
582 **Hoekenga OA** (2014) Single-Kernel Ionomics Profiles Are Highly Heritable  
583 Indicators of Genetic and Environmental Influences on Elemental Accumulation in  
584 Maize Grain (*Zea mays*). *PLoS One* **9**: e87628
- 585 **Benjamini Y, Hochberg Y** (1995) Controlling the false discovery rate: a practical and  
586 powerful approach to multiple testing. *Journal of the Royal Statistical Society. Series*  
587 *B (Methodological)*: 289-300
- 588 **Box GE, Cox DR** (1964) An analysis of transformations. *Journal of the Royal Statistical*  
589 *Society. Series B (Methodological)*: 211-252
- 590 **Broadley MR, White PJ** (2012) Some elements are more equal than others: soil-to-plant  
591 transfer of radiocaesium and radiostrontium, revisited. *Plant and soil* **355**: 23-27
- 592 **Buescher E, Achberger T, Amusan I, Giannini A, Ochsenfeld C, Rus A, Lahner B,**  
593 **Hoekenga O, Yakubova E, Harper JF** (2010) Natural genetic variation in selected  
594 populations of *Arabidopsis thaliana* is associated with ionomic differences. *PLoS*  
595 *One* **5**: e11081
- 596 **Cakmak I** (2008) Enrichment of cereal grains with zinc: agronomic or genetic  
597 biofortification? *Plant and Soil* **302**: 1-17
- 598 **Casa AM, Pressoir G, Brown PJ, Mitchell SE, Rooney WL, Tuinstra MR, Franks CD,**  
599 **Kresovich S** (2008) Community resources and strategies for association mapping in  
600 sorghum. *Crop science* **48**: 30-40
- 601 **Chao D-Y, Silva A, Baxter I, Huang YS, Nordborg M, Danku J, Lahner B, Yakubova E,**  
602 **Salt DE** (2012) Genome-wide association studies identify heavy metal ATPase3 as



- 603 the primary determinant of natural variation in leaf cadmium in *Arabidopsis*  
604 *thaliana*. *PLoS genetics* **8**: e1002923
- 605 **Connolly EL, Campbell NH, Grotz N, Prichard CL, Guerinot ML** (2003) Overexpression of  
606 the FRO2 ferric chelate reductase confers tolerance to growth on low iron and  
607 uncovers posttranscriptional control. *Plant Physiology* **133**: 1102-1110
- 608 **Conover WJ, Iman RL** (1981) Rank transformations as a bridge between parametric and  
609 nonparametric statistics. *The American Statistician* **35**: 124-129
- 610 **Curie C, Cassin G, Couch D, Divol F, Higuchi K, Le Jean M, Misson J, Schikora A, Czernic**  
611 **P, Mari S** (2009) Metal movement within the plant: contribution of nicotianamine  
612 and yellow stripe 1-like transporters. *Annals of botany* **103**: 1-11
- 613 **Curie C, Panaviene Z, Loulergue C, Dellaporta SL, Briat J-F, Walker EL** (2001) Maize  
614 yellow stripe1 encodes a membrane protein directly involved in Fe (III) uptake.  
615 *Nature* **409**: 346-349
- 616 **Das P, Samantaray S, Rout G** (1997) Studies on cadmium toxicity in plants: a review.  
617 *Environmental pollution* **98**: 29-36
- 618 **Delhaize E, Gruber BD, Pittman JK, White RG, Leung H, Miao Y, Jiang L, Ryan PR,**  
619 **Richardson AE** (2007) A role for the AtMTP11 gene of *Arabidopsis* in manganese  
620 transport and tolerance. *The Plant Journal* **51**: 198-210
- 621 **Gendre D, Czernic P, Conéjéro G, Pianelli K, Briat JF, Lebrun M, Mari S** (2007) TcYSL3, a  
622 member of the YSL gene family from the hyper - accumulator *Thlaspi caerulescens*,  
623 encodes a nicotianamine - Ni/Fe transporter. *The Plant Journal* **49**: 1-15
- 624 **Gomez-Becerra HF, Yazici A, Ozturk L, Budak H, Peleg Z, Morgounov A, Fahima T,**  
625 **Saranga Y, Cakmak I** (2010) Genetic variation and environmental stability of grain  
626 mineral nutrient concentrations in *Triticum dicoccoides* under five environments.  
627 *Euphytica* **171**: 39-52
- 628 **Graham R, Senadhira D, Beebe S, Iglesias C, Monasterio I** (1999) Breeding for  
629 micronutrient density in edible portions of staple food crops: conventional  
630 approaches. *Field Crops Research* **60**: 57-80
- 631 **Gregorio GB, Senadhira D, Htut H, Graham RD** (2000) Breeding for trace mineral density  
632 in rice. *Food & Nutrition Bulletin* **21**: 382-386
- 633 **Huang X, Wei X, Sang T, Zhao Q, Feng Q, Zhao Y, Li C, Zhu C, Lu T, Zhang Z** (2010)  
634 Genome-wide association studies of 14 agronomic traits in rice landraces. *Nature*  
635 *genetics* **42**: 961-967
- 636 **Hutchin ME, Vaughan BE** (1968) Relation between simultaneous Ca and Sr transport rates  
637 in isolated segments of vetch, barley, and pine roots. *Plant physiology* **43**: 1913-  
638 1918
- 639 **Kang HM, Sul JH, Service SK, Zaitlen NA, Kong S-y, Freimer NB, Sabatti C, Eskin E**  
640 (2010) Variance component model to account for sample structure in genome-wide  
641 association studies. *Nature genetics* **42**: 348-354
- 642 **Kang HM, Zaitlen NA, Wade CM, Kirby A, Heckerman D, Daly MJ, Eskin E** (2008)  
643 Efficient control of population structure in model organism association mapping.  
644 *Genetics* **178**: 1709-1723
- 645 **Kimber CT, Dahlberg JA, Kresovich S** (2013) The gene pool of *Sorghum bicolor* and its  
646 improvement. *In Genomics of the Saccharinae*. Springer, pp 23-41

- 647 **Lahner B, Gong J, Mahmoudian M, Smith EL, Abid KB, Rogers EE, Guerinot ML, Harper**  
648 **JF, Ward JM, McIntyre L** (2003) Genomic scale profiling of nutrient and trace  
649 elements in *Arabidopsis thaliana*. *Nature biotechnology* **21**: 1215-1221
- 650 **Lestienne I, Icard-Vernière C, Mouquet C, Picq C, Trèche S** (2005) Effects of soaking  
651 whole cereal and legume seeds on iron, zinc and phytate contents. *Food Chemistry*  
652 **89**: 421-425
- 653 **Lipka AE, Tian F, Wang Q, Peiffer J, Li M, Bradbury PJ, Gore MA, Buckler ES, Zhang Z**  
654 (2012) GAPIT: genome association and prediction integrated tool. *Bioinformatics*  
655 **28**: 2397-2399
- 656 **Ma JF, Yamaji N, Mitani N, Xu X-Y, Su Y-H, McGrath SP, Zhao F-J** (2008) Transporters of  
657 arsenite in rice and their role in arsenic accumulation in rice grain. *Proceedings of*  
658 *the National Academy of Sciences* **105**: 9931-9935
- 659 **Maathuis FJ** (2009) Physiological functions of mineral macronutrients. *Current opinion in*  
660 *plant biology* **12**: 250-258
- 661 **Marschner H, Marschner P** (2012) Marschner's mineral nutrition of higher plants, Vol 89.  
662 Academic press
- 663 **Mengesha MH** (1966) Chemical composition of teff (*Eragrostis tef*) compared with that of  
664 wheat, barley and grain sorghum. *Economic Botany* **20**: 268-273
- 665 **Monti A, Di Virgilio N, Venturi G** (2008) Mineral composition and ash content of six major  
666 energy crops. *Biomass and Bioenergy* **32**: 216-223
- 667 **Morel M, Crouzet J, Gravot A, Auroy P, Leonhardt N, Vavasseur A, Richaud P** (2009)  
668 AtHMA3, a P1B-ATPase allowing Cd/Zn/Co/Pb vacuolar storage in *Arabidopsis*.  
669 *Plant Physiology* **149**: 894-904
- 670 **Morris GP, Ramu P, Deshpande SP, Hash CT, Shah T, Upadhyaya HD, Riera-Lizarazu O,**  
671 **Brown PJ, Acharya CB, Mitchell SE** (2013) Population genomic and genome-wide  
672 association studies of agroclimatic traits in sorghum. *Proceedings of the National*  
673 *Academy of Sciences* **110**: 453-458
- 674 **Neucere NJ, Sumrell G** (1980) Chemical composition of different varieties of grain  
675 sorghum. *Journal of agricultural and food chemistry* **28**: 19-21
- 676 **Norton GJ, Deacon CM, Xiong L, Huang S, Meharg AA, Price AH** (2010) Genetic mapping  
677 of the rice ironome in leaves and grain: identification of QTLs for 17 elements  
678 including arsenic, cadmium, iron and selenium. *Plant and soil* **329**: 139-153
- 679 **Obernberger I, Biedermann F, Widmann W, Riedl R** (1997) Concentrations of inorganic  
680 elements in biomass fuels and recovery in the different ash fractions. *Biomass and*  
681 *bioenergy* **12**: 211-224
- 682 **Organization WH** (2002) The world health report 2002: reducing risks, promoting healthy  
683 life. World Health Organization
- 684 **Ortiz-Monasterio J, Palacios-Rojas N, Meng E, Pixley K, Trethowan R, Pena R** (2007)  
685 Enhancing the mineral and vitamin content of wheat and maize through plant  
686 breeding. *Journal of Cereal Science* **46**: 293-307
- 687 **Ozgen S, Busse JS, Palta JP** (2011) Influence of Root Zone Calcium on Shoot Tip Necrosis  
688 and Apical Dominance of Potato Shoot: Simulation of This Disorder by Ethylene  
689 Glycol Tetra Acetic Acid and Prevention by Strontium. *HortScience* **46**: 1358-1362
- 690 **Peleg Z, Cakmak I, Ozturk L, Yazici A, Jun Y, Budak H, Korol AB, Fahima T, Saranga Y**  
691 (2009) Quantitative trait loci conferring grain mineral nutrient concentrations in

- 692 durum wheat× wild emmer wheat RIL population. *Theoretical and Applied Genetics*  
693 **119**: 353-369
- 694 **Queen WH, Fleming HW, O'Kelley JC** (1963) Effects on *Zea mays* seedlings of a strontium  
695 replacement for calcium in nutrient media. *Plant physiology* **38**: 410
- 696 **R Development Core Team** (2014) R: a language and environment for statistical  
697 computing. Vienna, Austria: R Foundation for Statistical Computing; 2012. Open  
698 access available at: <http://cran.r-project.org>
- 699 **Ragae S, Abdel-Aal E-SM, Noaman M** (2006) Antioxidant activity and nutrient  
700 composition of selected cereals for food use. *Food Chemistry* **98**: 32-38
- 701 **Ripley B, Venables B, Bates DM, Hornik K, Gebhardt A, Firth D, Ripley MB** (2014)  
702 Package 'MASS'.
- 703 **Salt DE, Baxter I, Lahner B** (2008) Ionomics and the study of the plant ionome. *Annu. Rev.*  
704 *Plant Biol.* **59**: 709-733
- 705 **Sauvage C, Segura V, Bauchet G, Stevens R, Do PT, Nikoloski Z, Fernie AR, Causse M**  
706 (2014) Genome Wide Association in tomato reveals 44 candidate loci for fruit  
707 metabolic traits. *Plant Physiology*: pp. 114.241521
- 708 **Schroeder JI, Delhaize E, Frommer WB, Guerinot ML, Harrison MJ, Herrera-Estrella L,**  
709 **Horie T, Kochian LV, Munns R, Nishizawa NK** (2013) Using membrane  
710 transporters to improve crops for sustainable food production. *Nature* **497**: 60-66
- 711 **Segura V, Vilhjálmsson BJ, Platt A, Korte A, Seren Ü, Long Q, Nordborg M** (2012) An  
712 efficient multi-locus mixed-model approach for genome-wide association studies in  
713 structured populations. *Nature genetics* **44**: 825-830
- 714 **Shi R, Li H, Tong Y, Jing R, Zhang F, Zou C** (2008) Identification of quantitative trait locus  
715 of zinc and phosphorus density in wheat (*Triticum aestivum* L.) grain. *Plant and soil*  
716 **306**: 95-104
- 717 **Šimić D, Drinić SM, Zdunić Z, Jambrović A, Ledenčan T, Brkić J, Brkić A, Brkić I** (2012)  
718 Quantitative trait loci for biofortification traits in maize grain. *Journal of Heredity*  
719 **103**: 47-54
- 720 **Tian F, Bradbury PJ, Brown PJ, Hung H, Sun Q, Flint-Garcia S, Rocheford TR, McMullen**  
721 **MD, Holland JB, Buckler ES** (2011) Genome-wide association study of leaf  
722 architecture in the maize nested association mapping population. *Nature genetics*  
723 **43**: 159-162
- 724 **USDA A, National Genetic Resources Program.** Germplasm Resources Information  
725 Network - (GRIN) *In*, National Germplasm Resources Laboratory, Beltsville,  
726 Maryland.
- 727 **Van Poecke RM, Sato M, Lenarz-Wyatt L, Weisberg S, Katagiri F** (2007) Natural  
728 variation in RPS2-mediated resistance among *Arabidopsis* accessions: correlation  
729 between gene expression profiles and phenotypic responses. *The Plant Cell Online*  
730 **19**: 4046-4060
- 731 **VanRaden P** (2008) Efficient methods to compute genomic predictions. *Journal of dairy*  
732 *science* **91**: 4414-4423
- 733 **Vert G, Grotz N, Dédaldéchamp F, Gaymard F, Guerinot ML, Briat J-F, Curie C** (2002)  
734 IRT1, an *Arabidopsis* transporter essential for iron uptake from the soil and for  
735 plant growth. *The Plant Cell Online* **14**: 1223-1233

- 736 **Vreugdenhil D, Aarts M, Koornneef M, Nelissen H, Ernst W** (2004) Natural variation and  
737 QTL analysis for cationic mineral content in seeds of *Arabidopsis thaliana*. *Plant, Cell*  
738 *& Environment* **27**: 828-839
- 739 **Waters BM, Grusak MA** (2008) Quantitative trait locus mapping for seed mineral  
740 concentrations in two *Arabidopsis thaliana* recombinant inbred populations. *New*  
741 *Phytologist* **179**: 1033-1047
- 742 **White PJ, Broadley MR** (2005) Biofortifying crops with essential mineral elements.  
743 *Trends in plant science* **10**: 586-593
- 744 **Yi Y, Guerinot ML** (1996) Genetic evidence that induction of root Fe (III) chelate reductase  
745 activity is necessary for iron uptake under iron deficiency†. *The Plant Journal* **10**:  
746 835-844
- 747 **Zhang M, Pinson SR, Tarpley L, Huang X-Y, Lahner B, Yakubova E, Baxter I, Guerinot**  
748 **ML, Salt DE** (2014) Mapping and validation of quantitative trait loci associated with  
749 concentrations of 16 elements in unmilled rice grain. *Theoretical and Applied*  
750 *Genetics* **127**: 137-165
- 751 **Zhang T, Zhao X, Wang W, Pan Y, Huang L, Liu X, Zong Y, Zhu L, Yang D, Fu B** (2012)  
752 Comparative transcriptome profiling of chilling stress responsiveness in two  
753 contrasting rice genotypes. *PloS one* **7**: e43274
- 754 **Zhang Z, Ersoz E, Lai C-Q, Todhunter RJ, Tiwari HK, Gore MA, Bradbury PJ, Yu J, Arnett**  
755 **DK, Ordovas JM** (2010) Mixed linear model approach adapted for genome-wide  
756 association studies. *Nature genetics* **42**: 355-360
- 757 **Zhao K, Tung C-W, Eizenga GC, Wright MH, Ali ML, Price AH, Norton GJ, Islam MR,**  
758 **Reynolds A, Mezey J** (2011) Genome-wide association mapping reveals a rich  
759 genetic architecture of complex traits in *Oryza sativa*. *Nature communications* **2**:  
760 467  
761

## Parsed Citations

bioRxiv preprint doi: <https://doi.org/10.1101/019083>; this version posted December 19, 2015. The copyright holder for this preprint (which was not certified by peer review) is the author/funder. All rights reserved. No reuse allowed without permission.

Pubmed: [Author and Title](#)

CrossRef: [Author and Title](#)

Google Scholar: [Author Only](#) [Title Only](#) [Author and Title](#)

**Arao T, Ae N (2003) Genotypic variations in cadmium levels of rice grain. Soil Science and Plant Nutrition 49: 473-479**

Pubmed: [Author and Title](#)

CrossRef: [Author and Title](#)

Google Scholar: [Author Only](#) [Title Only](#) [Author and Title](#)

**Aschner JL, Aschner M (2005) Nutritional aspects of manganese homeostasis. Molecular aspects of medicine 26: 353-362**

Pubmed: [Author and Title](#)

CrossRef: [Author and Title](#)

Google Scholar: [Author Only](#) [Title Only](#) [Author and Title](#)

**Ayana A, Bekele E (2000) Geographical patterns of morphological variation in sorghum (*Sorghum bicolor* (L.) Moench) germplasm from Ethiopia and Eritrea: quantitative characters. Euphytica 115: 91-104**

Pubmed: [Author and Title](#)

CrossRef: [Author and Title](#)

Google Scholar: [Author Only](#) [Title Only](#) [Author and Title](#)

**Bates D, Mächler M, Bolker B, Walker S (2014) Fitting linear mixed-effects models using lme4. arXiv preprint arXiv:1406.5823**

Pubmed: [Author and Title](#)

CrossRef: [Author and Title](#)

Google Scholar: [Author Only](#) [Title Only](#) [Author and Title](#)

**Baxter I, Brazelton JN, Yu D, Huang YS, Lahner B, Yakubova E, Li Y, Bergelson J, Borevitz JO, Nordborg M (2010) A coastal cline in sodium accumulation in *Arabidopsis thaliana* is driven by natural variation of the sodium transporter *AtHKT1; 1*. PLoS genetics 6: e1001193**

Pubmed: [Author and Title](#)

CrossRef: [Author and Title](#)

Google Scholar: [Author Only](#) [Title Only](#) [Author and Title](#)

**Baxter IR, Gustin JL, Settles AM, Hoekenga OA (2013) Ionic characterization of maize kernels in the intermated B73× Mo17 population. Crop Science 53: 208-220**

Pubmed: [Author and Title](#)

CrossRef: [Author and Title](#)

Google Scholar: [Author Only](#) [Title Only](#) [Author and Title](#)

**Baxter IR, Vitek O, Lahner B, Muthukumar B, Borghi M, Morrissey J, Guerinot ML, Salt DE (2008) The leaf ionome as a multivariable system to detect a plant's physiological status. Proceedings of the National Academy of Sciences 105: 12081-12086**

Pubmed: [Author and Title](#)

CrossRef: [Author and Title](#)

Google Scholar: [Author Only](#) [Title Only](#) [Author and Title](#)

**Baxter IR, Ziegler G, Lahner B, Mickelbart MV, Foley R, Danku J, Armstrong P, Salt DE, Hoekenga OA (2014) Single-Kernel Ionic Profiles Are Highly Heritable Indicators of Genetic and Environmental Influences on Elemental Accumulation in Maize Grain (*Zea mays*). PLoS One 9: e87628**

Pubmed: [Author and Title](#)

CrossRef: [Author and Title](#)

Google Scholar: [Author Only](#) [Title Only](#) [Author and Title](#)

**Benjamini Y, Hochberg Y (1995) Controlling the false discovery rate: a practical and powerful approach to multiple testing. Journal of the Royal Statistical Society. Series B (Methodological): 289-300**

Pubmed: [Author and Title](#)

CrossRef: [Author and Title](#)

Google Scholar: [Author Only](#) [Title Only](#) [Author and Title](#)

**Box GE, Cox DR (1964) An analysis of transformations. Journal of the Royal Statistical Society. Series B (Methodological): 211-252**

Pubmed: [Author and Title](#)

CrossRef: [Author and Title](#)

Google Scholar: [Author Only](#) [Title Only](#) [Author and Title](#)

**Broadley MR, White PJ (2012) Some elements are more equal than others: soil-to-plant transfer of radiocaesium and radiostrontium, revisited. Plant and soil 355: 23-27**

Pubmed: [Author and Title](#)

CrossRef: [Author and Title](#)

Google Scholar: [Author Only](#) [Title Only](#) [Author and Title](#)

**Buescher E, Achberger T, Amusan I, Giannini A, Ochsenfeld C, Rus A, Lahner B, Hoekenga O, Yakubova E, Harper JF (2010) Natural genetic variation in selected populations of *Arabidopsis thaliana* is associated with ionic differences. PLoS One 5: e11081**

Pubmed: [Author and Title](#)

CrossRef: [Author and Title](#)

Google Scholar: [Author Only](#) [Title Only](#) [Author and Title](#)

**Cakmak I (2008) Enrichment of cereal grains with zinc: agronomic or genetic biofortification? Plant and Soil 302: 1-17**



Pubmed: [Author and Title](#)

CrossRef: [Author and Title](#)

Google Scholar: [Author Only Title Only Author and Title](#)

bioRxiv preprint doi: <https://doi.org/10.1101/019083>; this version posted December 19, 2015. The copyright holder for this preprint (which was not certified by peer review) is the author/funder. All rights reserved. No reuse allowed without permission.

**Casa AM, Pressoir C, Brown PJ, Mitchell SL, Rooney WL, Tumstra MR, Franks CD, Kresovich S (2006) Community resources and strategies for association mapping in sorghum. *Crop science* 48: 30-40**

Pubmed: [Author and Title](#)

CrossRef: [Author and Title](#)

Google Scholar: [Author Only Title Only Author and Title](#)

**Chao D-Y, Silva A, Baxter I, Huang YS, Nordborg M, Danku J, Lahner B, Yakubova E, Salt DE (2012) Genome-wide association studies identify heavy metal ATPase3 as the primary determinant of natural variation in leaf cadmium in *Arabidopsis thaliana*. *PLoS genetics* 8: e1002923**

Pubmed: [Author and Title](#)

CrossRef: [Author and Title](#)

Google Scholar: [Author Only Title Only Author and Title](#)

**Connolly EL, Campbell NH, Grotz N, Prichard CL, Guerinot ML (2003) Overexpression of the FRO2 ferric chelate reductase confers tolerance to growth on low iron and uncovers posttranscriptional control. *Plant Physiology* 133: 1102-1110**

Pubmed: [Author and Title](#)

CrossRef: [Author and Title](#)

Google Scholar: [Author Only Title Only Author and Title](#)

**Conover WJ, Iman RL (1981) Rank transformations as a bridge between parametric and nonparametric statistics. *The American Statistician* 35: 124-129**

Pubmed: [Author and Title](#)

CrossRef: [Author and Title](#)

Google Scholar: [Author Only Title Only Author and Title](#)

**Curie C, Cassin G, Couch D, Divol F, Higuchi K, Le Jean M, Misson J, Schikora A, Czernic P, Mari S (2009) Metal movement within the plant: contribution of nicotianamine and yellow stripe 1-like transporters. *Annals of botany* 103: 1-11**

Pubmed: [Author and Title](#)

CrossRef: [Author and Title](#)

Google Scholar: [Author Only Title Only Author and Title](#)

**Curie C, Panaviene Z, Loulergue C, Dellaporta SL, Briat J-F, Walker EL (2001) Maize yellow stripe1 encodes a membrane protein directly involved in Fe (III) uptake. *Nature* 409: 346-349**

Pubmed: [Author and Title](#)

CrossRef: [Author and Title](#)

Google Scholar: [Author Only Title Only Author and Title](#)

**Das P, Samantaray S, Rout G (1997) Studies on cadmium toxicity in plants: a review. *Environmental pollution* 98: 29-36**

Pubmed: [Author and Title](#)

CrossRef: [Author and Title](#)

Google Scholar: [Author Only Title Only Author and Title](#)

**Delhaize E, Gruber BD, Pittman JK, White RG, Leung H, Miao Y, Jiang L, Ryan PR, Richardson AE (2007) A role for the AtMTP11 gene of *Arabidopsis* in manganese transport and tolerance. *The Plant Journal* 51: 198-210**

Pubmed: [Author and Title](#)

CrossRef: [Author and Title](#)

Google Scholar: [Author Only Title Only Author and Title](#)

**Gendre D, Czernic P, Conéjéro G, Pianelli K, Briat JF, Lebrun M, Mari S (2007) TcYSL3, a member of the YSL gene family from the hyper-accumulator *Thlaspi caerulescens*, encodes a nicotianamine-Ni/Fe transporter. *The Plant Journal* 49: 1-15**

Pubmed: [Author and Title](#)

CrossRef: [Author and Title](#)

Google Scholar: [Author Only Title Only Author and Title](#)

**Gomez-Becerra HF, Yazici A, Ozturk L, Budak H, Peleg Z, Morgounov A, Fahima T, Saranga Y, Cakmak I (2010) Genetic variation and environmental stability of grain mineral nutrient concentrations in *Triticum dicoccoides* under five environments. *Euphytica* 171: 39-52**

Pubmed: [Author and Title](#)

CrossRef: [Author and Title](#)

Google Scholar: [Author Only Title Only Author and Title](#)

**Graham R, Senadhira D, Beebe S, Iglesias C, Monasterio I (1999) Breeding for micronutrient density in edible portions of staple food crops: conventional approaches. *Field Crops Research* 60: 57-80**

Pubmed: [Author and Title](#)

CrossRef: [Author and Title](#)

Google Scholar: [Author Only Title Only Author and Title](#)

**Gregorio GB, Senadhira D, Htut H, Graham RD (2000) Breeding for trace mineral density in rice. *Food & Nutrition Bulletin* 21: 382-386**

Pubmed: [Author and Title](#)

CrossRef: [Author and Title](#)

Google Scholar: [Author Only Title Only Author and Title](#)

**Huang X, Wei X, Sang T, Zhao Q, Feng Q, Zhao Y, Li C, Zhu C, Lu T, Zhang Z (2010) Genome-wide association studies of 14 agronomic traits in rice landraces. *Nature genetics* 42: 961-967**

Pubmed: [Author and Title](#)

CrossRef: [Author and Title](#)  
Google Scholar: [Author Only Title Only Author and Title](#)

**Hutchins ME, Vaughan BE (1968) Relation between simultaneous Ca and Sr transport rates in isolated segments of vetch, barley and pine roots. Plant Physiology 43: 1913-1918**

Pubmed: [Author and Title](#)  
CrossRef: [Author and Title](#)  
Google Scholar: [Author Only Title Only Author and Title](#)

**Kang HM, Sul JH, Service SK, Zaitlen NA, Kong S-y, Freimer NB, Sabatti C, Eskin E (2010) Variance component model to account for sample structure in genome-wide association studies. Nature genetics 42: 348-354**

Pubmed: [Author and Title](#)  
CrossRef: [Author and Title](#)  
Google Scholar: [Author Only Title Only Author and Title](#)

**Kang HM, Zaitlen NA, Wade CM, Kirby A, Heckerman D, Daly MJ, Eskin E (2008) Efficient control of population structure in model organism association mapping. Genetics 178: 1709-1723**

Pubmed: [Author and Title](#)  
CrossRef: [Author and Title](#)  
Google Scholar: [Author Only Title Only Author and Title](#)

**Kimber CT, Dahlberg JA, Kresovich S (2013) The gene pool of Sorghum bicolor and its improvement. In Genomics of the Saccharinae. Springer, pp 23-41**

Pubmed: [Author and Title](#)  
CrossRef: [Author and Title](#)  
Google Scholar: [Author Only Title Only Author and Title](#)

**Lahner B, Gong J, Mahmoudian M, Smith EL, Abid KB, Rogers EE, Guerinot ML, Harper JF, Ward JM, McIntyre L (2003) Genomic scale profiling of nutrient and trace elements in Arabidopsis thaliana. Nature biotechnology 21: 1215-1221**

Pubmed: [Author and Title](#)  
CrossRef: [Author and Title](#)  
Google Scholar: [Author Only Title Only Author and Title](#)

**Lestienne I, Icard-Vernière C, Mouquet C, Picq C, Trèche S (2005) Effects of soaking whole cereal and legume seeds on iron, zinc and phytate contents. Food Chemistry 89: 421-425**

Pubmed: [Author and Title](#)  
CrossRef: [Author and Title](#)  
Google Scholar: [Author Only Title Only Author and Title](#)

**Lipka AE, Tian F, Wang Q, Peiffer J, Li M, Bradbury PJ, Gore MA, Buckler ES, Zhang Z (2012) GAPIT: genome association and prediction integrated tool. Bioinformatics 28: 2397-2399**

Pubmed: [Author and Title](#)  
CrossRef: [Author and Title](#)  
Google Scholar: [Author Only Title Only Author and Title](#)

**Ma JF, Yamaji N, Mitani N, Xu X-Y, Su Y-H, McGrath SP, Zhao F-J (2008) Transporters of arsenite in rice and their role in arsenic accumulation in rice grain. Proceedings of the National Academy of Sciences 105: 9931-9935**

Pubmed: [Author and Title](#)  
CrossRef: [Author and Title](#)  
Google Scholar: [Author Only Title Only Author and Title](#)

**Maathuis FJ (2009) Physiological functions of mineral macronutrients. Current opinion in plant biology 12: 250-258**

Pubmed: [Author and Title](#)  
CrossRef: [Author and Title](#)  
Google Scholar: [Author Only Title Only Author and Title](#)

**Marschner H, Marschner P (2012) Marschner's mineral nutrition of higher plants, Vol 89. Academic press**

Pubmed: [Author and Title](#)  
CrossRef: [Author and Title](#)  
Google Scholar: [Author Only Title Only Author and Title](#)

**Mengesha MH (1966) Chemical composition of teff (Eragrostis tef) compared with that of wheat, barley and grain sorghum. Economic Botany 20: 268-273**

Pubmed: [Author and Title](#)  
CrossRef: [Author and Title](#)  
Google Scholar: [Author Only Title Only Author and Title](#)

**Monti A, Di Virgilio N, Venturi G (2008) Mineral composition and ash content of six major energy crops. Biomass and Bioenergy 32: 216-223**

Pubmed: [Author and Title](#)  
CrossRef: [Author and Title](#)  
Google Scholar: [Author Only Title Only Author and Title](#)

**Morel M, Cruzet J, Gravot A, Auroy P, Leonhardt N, Vavasseur A, Richaud P (2009) AtHMA3, a P1B-ATPase allowing Cd/Zn/Co/Pb vacuolar storage in Arabidopsis. Plant Physiology 149: 894-904**

Pubmed: [Author and Title](#)  
CrossRef: [Author and Title](#)  
Google Scholar: [Author Only Title Only Author and Title](#)

**Morris GP, Ramu P, Deshpande SP, Hash CT, Shah T, Upadhyaya HD, Riera-Lizarazu O, Brown PJ, Acharya CB, Mitchell SE (2013) Population genomic and genome-wide association studies of agroclimatic traits in sorghum. Proceedings of the National Academy**

of Sciences 110: 453-458

Pubmed: [Author and Title](#)

CrossRef: [Author and Title](#)

Google Scholar: [Author Only Title Only Author and Title](#)  
not certified by peer review) is the author/funder. All rights reserved. No reuse allowed without permission.

**Neucere NJ, Sumrell G (1980) Chemical composition of different varieties of grain sorghum. Journal of agricultural and food chemistry 28: 19-21**

Pubmed: [Author and Title](#)

CrossRef: [Author and Title](#)

Google Scholar: [Author Only Title Only Author and Title](#)

**Norton GJ, Deacon CM, Xiong L, Huang S, Meharg AA, Price AH (2010) Genetic mapping of the rice ionome in leaves and grain: identification of QTLs for 17 elements including arsenic, cadmium, iron and selenium. Plant and soil 329: 139-153**

Pubmed: [Author and Title](#)

CrossRef: [Author and Title](#)

Google Scholar: [Author Only Title Only Author and Title](#)

**Obernberger I, Biedermann F, Widmann W, Riedl R (1997) Concentrations of inorganic elements in biomass fuels and recovery in the different ash fractions. Biomass and bioenergy 12: 211-224**

Pubmed: [Author and Title](#)

CrossRef: [Author and Title](#)

Google Scholar: [Author Only Title Only Author and Title](#)

**Organization WH (2002) The world health report 2002: reducing risks, promoting healthy life. World Health Organization**

Pubmed: [Author and Title](#)

CrossRef: [Author and Title](#)

Google Scholar: [Author Only Title Only Author and Title](#)

**Ortiz-Monasterio J, Palacios-Rojas N, Meng E, Pixley K, Trethowan R, Pena R (2007) Enhancing the mineral and vitamin content of wheat and maize through plant breeding. Journal of Cereal Science 46: 293-307**

Pubmed: [Author and Title](#)

CrossRef: [Author and Title](#)

Google Scholar: [Author Only Title Only Author and Title](#)

**Ozgen S, Busse JS, Palta JP (2011) Influence of Root Zone Calcium on Shoot Tip Necrosis and Apical Dominance of Potato Shoot: Simulation of This Disorder by Ethylene Glycol Tetra Acetic Acid and Prevention by Strontium. HortScience 46: 1358-1362**

Pubmed: [Author and Title](#)

CrossRef: [Author and Title](#)

Google Scholar: [Author Only Title Only Author and Title](#)

**Peleg Z, Cakmak I, Ozturk L, Yazici A, Jun Y, Budak H, Korol AB, Fahima T, Saranga Y (2009) Quantitative trait loci conferring grain mineral nutrient concentrations in durum wheat × wild emmer wheat RIL population. Theoretical and Applied Genetics 119: 353-369**

Pubmed: [Author and Title](#)

CrossRef: [Author and Title](#)

Google Scholar: [Author Only Title Only Author and Title](#)

**Queen WH, Fleming HW, O'Kelley JC (1963) Effects on Zea mays seedlings of a strontium replacement for calcium in nutrient media. Plant physiology 38: 410**

Pubmed: [Author and Title](#)

CrossRef: [Author and Title](#)

Google Scholar: [Author Only Title Only Author and Title](#)

**R Development Core Team (2014) R: a language and environment for statistical computing. Vienna, Austria: R Foundation for Statistical Computing; 2012. Open access available at: <http://cran.r-project.org>**

Pubmed: [Author and Title](#)

CrossRef: [Author and Title](#)

Google Scholar: [Author Only Title Only Author and Title](#)

**Ragae S, Abdel-Aal E-SM, Noaman M (2006) Antioxidant activity and nutrient composition of selected cereals for food use. Food Chemistry 98: 32-38**

Pubmed: [Author and Title](#)

CrossRef: [Author and Title](#)

Google Scholar: [Author Only Title Only Author and Title](#)

**Ripley B, Venables B, Bates DM, Hornik K, Gebhardt A, Firth D, Ripley MB (2014) Package 'MASS'.**

**Salt DE, Baxter I, Lahner B (2008) Ionomics and the study of the plant ionome. Annu. Rev. Plant Biol. 59: 709-733**

Pubmed: [Author and Title](#)

CrossRef: [Author and Title](#)

Google Scholar: [Author Only Title Only Author and Title](#)

**Sauvage C, Segura V, Bauchet G, Stevens R, Do PT, Nikoloski Z, Fernie AR, Causse M (2014) Genome Wide Association in tomato reveals 44 candidate loci for fruit metabolic traits. Plant Physiology: pp. 114.241521**

Pubmed: [Author and Title](#)

CrossRef: [Author and Title](#)

Google Scholar: [Author Only Title Only Author and Title](#)

**Schroeder JI, Delhaize E, Frommer WB, Guerinot ML, Harrison MJ, Herrera-Estrella L, Horie T, Kochian LV, Munns R, Nishizawa NK (2013) Using membrane transporters to improve crops for sustainable food production. Nature 497: 60-66**

Pubmed: [Author and Title](#)

CrossRef: [Author and Title](#)



Google Scholar: [Author Only](#) [Title Only](#) [Author and Title](#)

**Segura V, Vilhjálmsson BJ, Platt A, Korte A, Seren Ü, Long Q, Nordborg M (2012) An efficient multi-locus mixed-model approach for genome-wide association studies in structured populations. Nature genetics 44: 825-830**

Pubmed: [Author and Title](#)

CrossRef: [Author and Title](#)

Google Scholar: [Author Only](#) [Title Only](#) [Author and Title](#)

**Shi R, Li H, Tong Y, Jing R, Zhang F, Zou C (2008) Identification of quantitative trait locus of zinc and phosphorus density in wheat (*Triticum aestivum* L.) grain. Plant and soil 306: 95-104**

Pubmed: [Author and Title](#)

CrossRef: [Author and Title](#)

Google Scholar: [Author Only](#) [Title Only](#) [Author and Title](#)

**Šimic D, Drinic SM, Zdunic Z, Jambrovic A, Ledencan T, Brkic J, Brkic A, Brkic I (2012) Quantitative trait loci for biofortification traits in maize grain. Journal of Heredity 103: 47-54**

Pubmed: [Author and Title](#)

CrossRef: [Author and Title](#)

Google Scholar: [Author Only](#) [Title Only](#) [Author and Title](#)

**Tian F, Bradbury PJ, Brown PJ, Hung H, Sun Q, Flint-Garcia S, Rocheford TR, McMullen MD, Holland JB, Buckler ES (2011) Genome-wide association study of leaf architecture in the maize nested association mapping population. Nature genetics 43: 159-162**

Pubmed: [Author and Title](#)

CrossRef: [Author and Title](#)

Google Scholar: [Author Only](#) [Title Only](#) [Author and Title](#)

**USDA, National Genetic Resources Program. Germplasm Resources Information Network - (GRIN) In, National Germplasm Resources Laboratory, Beltsville, Maryland.**

**Van Poecke RM, Sato M, Lenarz-Wyatt L, Weisberg S, Katagiri F (2007) Natural variation in RPS2-mediated resistance among *Arabidopsis* accessions: correlation between gene expression profiles and phenotypic responses. The Plant Cell Online 19: 4046-4060**

Pubmed: [Author and Title](#)

CrossRef: [Author and Title](#)

Google Scholar: [Author Only](#) [Title Only](#) [Author and Title](#)

**VanRaden P (2008) Efficient methods to compute genomic predictions. Journal of dairy science 91: 4414-4423**

Pubmed: [Author and Title](#)

CrossRef: [Author and Title](#)

Google Scholar: [Author Only](#) [Title Only](#) [Author and Title](#)

**Vert G, Grotz N, Dédaldéchamp F, Gaymard F, Guerinot ML, Briat J-F, Curie C (2002) IRT1, an *Arabidopsis* transporter essential for iron uptake from the soil and for plant growth. The Plant Cell Online 14: 1223-1233**

Pubmed: [Author and Title](#)

CrossRef: [Author and Title](#)

Google Scholar: [Author Only](#) [Title Only](#) [Author and Title](#)

**Vreugdenhil D, Aarts M, Koornneef M, Nelissen H, Ernst W (2004) Natural variation and QTL analysis for cationic mineral content in seeds of *Arabidopsis thaliana*. Plant, Cell & Environment 27: 828-839**

Pubmed: [Author and Title](#)

CrossRef: [Author and Title](#)

Google Scholar: [Author Only](#) [Title Only](#) [Author and Title](#)

**Waters BM, Grusak MA (2008) Quantitative trait locus mapping for seed mineral concentrations in two *Arabidopsis thaliana* recombinant inbred populations. New Phytologist 179: 1033-1047**

Pubmed: [Author and Title](#)

CrossRef: [Author and Title](#)

Google Scholar: [Author Only](#) [Title Only](#) [Author and Title](#)

**White PJ, Broadley MR (2005) Biofortifying crops with essential mineral elements. Trends in plant science 10: 586-593**

Pubmed: [Author and Title](#)

CrossRef: [Author and Title](#)

Google Scholar: [Author Only](#) [Title Only](#) [Author and Title](#)

**Yi Y, Guerinot ML (1996) Genetic evidence that induction of root Fe (III) chelate reductase activity is necessary for iron uptake under iron deficiency. The Plant Journal 10: 835-844**

Pubmed: [Author and Title](#)

CrossRef: [Author and Title](#)

Google Scholar: [Author Only](#) [Title Only](#) [Author and Title](#)

**Zhang M, Pinson SR, Tarpley L, Huang X-Y, Lahner B, Yakubova E, Baxter I, Guerinot ML, Salt DE (2014) Mapping and validation of quantitative trait loci associated with concentrations of 16 elements in unmilled rice grain. Theoretical and Applied Genetics 127: 137-165**

Pubmed: [Author and Title](#)

CrossRef: [Author and Title](#)

Google Scholar: [Author Only](#) [Title Only](#) [Author and Title](#)

**Zhang T, Zhao X, Wang W, Pan Y, Huang L, Liu X, Zong Y, Zhu L, Yang D, Fu B (2012) Comparative transcriptome profiling of chilling stress responsiveness in two contrasting rice genotypes. PloS one 7: e43274**

Pubmed: [Author and Title](#)

CrossRef: [Author and Title](#)

Google Scholar: [Author Only Title Only Author and Title](#)

bioRxiv preprint doi: <https://doi.org/10.1101/019083>; this version posted December 19, 2015. The copyright holder for this preprint (which was not certified by peer review) is the author/funder. All rights reserved. No reuse allowed without permission.

**Zhang Z, Ersoz E, Lai C-Q, Godwin R, Wang H, Gore MA, Bradbury P, Yu J, Arnett D, Ordovas JM (2010) Mixed linear model approach adapted for genome-wide association studies. Nature genetics 42: 355-360**

Pubmed: [Author and Title](#)

CrossRef: [Author and Title](#)

Google Scholar: [Author Only Title Only Author and Title](#)

**Zhao K, Tung C-W, Eizenga GC, Wright MH, Ali ML, Price AH, Norton GJ, Islam MR, Reynolds A, Mezey J (2011) Genome-wide association mapping reveals a rich genetic architecture of complex traits in *Oryza sativa*. Nature communications 2: 467**

Pubmed: [Author and Title](#)

CrossRef: [Author and Title](#)

Google Scholar: [Author Only Title Only Author and Title](#)
